# Supplementary material
Source: MDPI journal article supplement (https://www.mdpi.com/2073-4395/9/11/693)
Supplement: s1 [file s1]

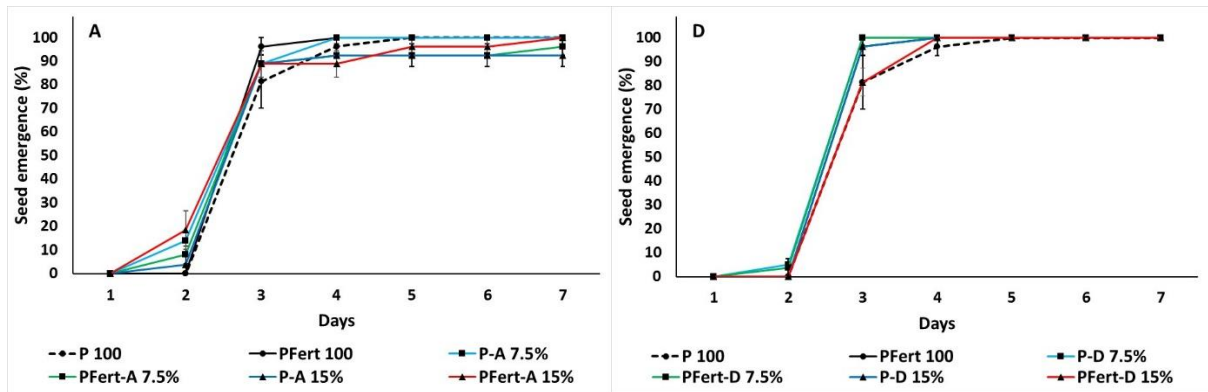

**Figure S1.** Cabbage cumulative seedling emergence in peat (P 100) with different biochar types (A, D) and ratio (7.5%, 15%) and mineral doses (with standard or with Fertilizers-Fert.). Error bars show SE (n=4).

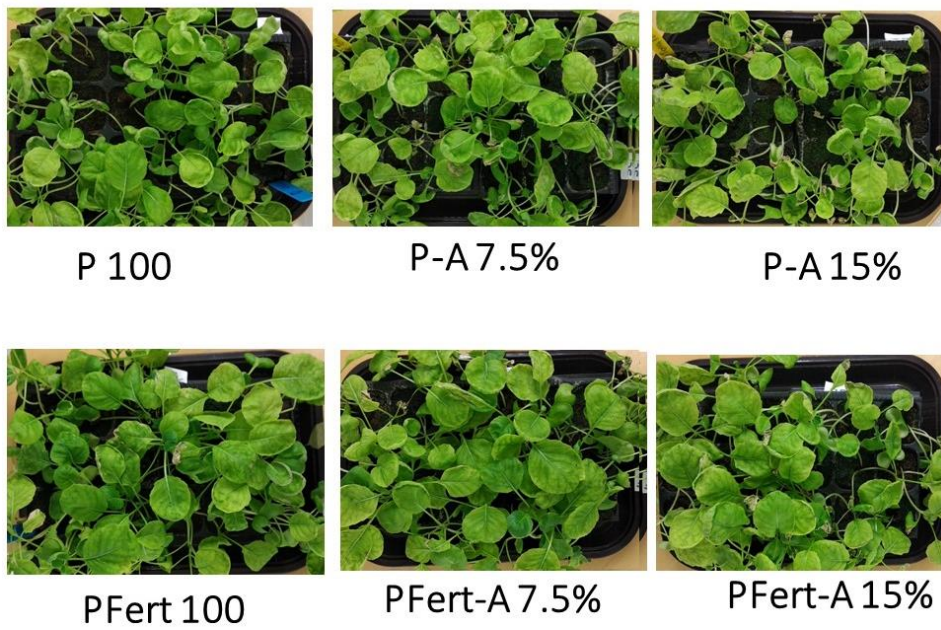

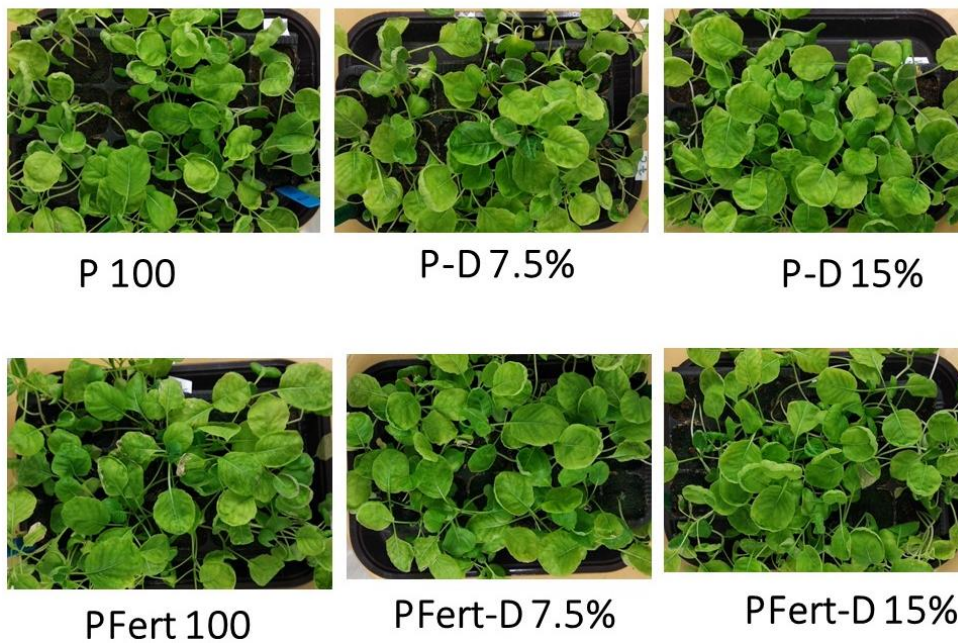

**Figure S2.** Cabbage seedling production in peat (P 100) with different biochar types (A, D) and ratio (7.5%, 15%) and mineral doses (with standard or with additional Fertilizers-Fert.).
